# Supplementary material for: Regulating retrotransposon activity through the use of alternative transcription start sites
Source: PubMed Central journal article supplement — EMBO Rep. 2016 Feb 22;17(5):753–68. doi: 10.15252/embr.201541866 (PMC5341516; doi:10.15252/embr.201541866), 2016-02-22
Supplement: EMBR-17-753-s001.pdf [file EMBR-17-753-s001.pdf]

## Expanded View Figures

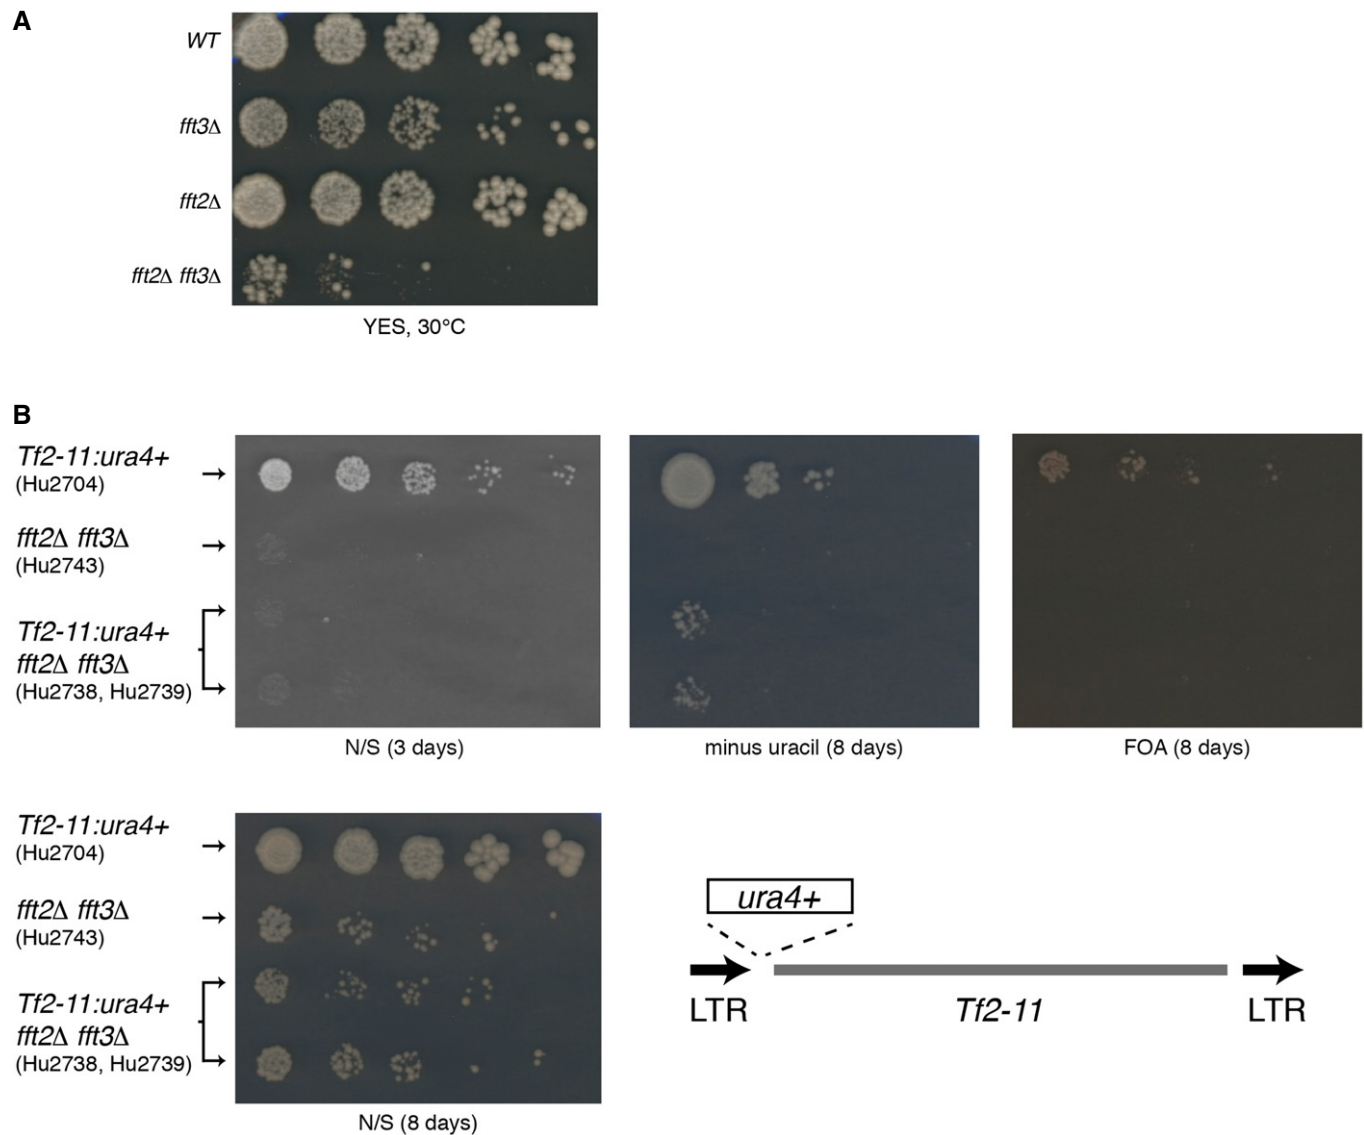

**Figure EV1. Slow growth phenotype and *Tf2* element derepression in *fft2Δ fft3Δ* cells.**

**A** WT (Hu0029), *fft2Δ* (Hu1955), *fft3Δ* (Hu1867), and *fft2Δfft3Δ* (Hu2000) cells were grown to log phase, spotted on YES media in fivefold serial dilutions, and grown at 30°C.

**B** Fivefold dilutions of cells grown to log phase were spotted on nonselective (N/S), selective (minus uracil), or counterselective (FOA) media. Plates were incubated at 30°C for 3 days (N/S) or 8 days (minus uracil, FOA). Schematic shows the location of the *ura4+* insert, upstream of the *Tf2-11* translation start codon.

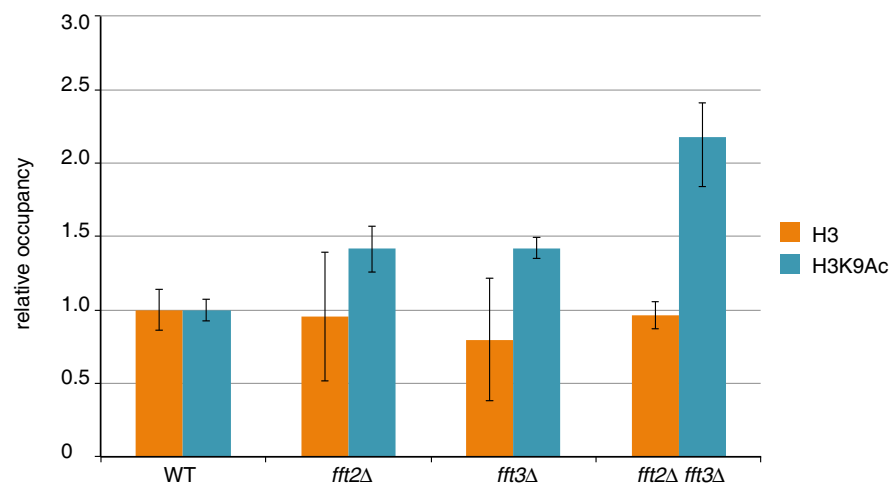

**Figure EV2. Transcription-associated histone mark elevated in *fft2* and *fft3* mutants.**

Acetylation of H3K9 is elevated at Tf2 elements in *fft2*Δ, *fft3*Δ, and *fft2*Δ *fft3*Δ. Error bars represent the standard deviation of biological triplicate samples. Occupancy is relative to a control gene (SPAC1F8.07c) promoter and to WT.

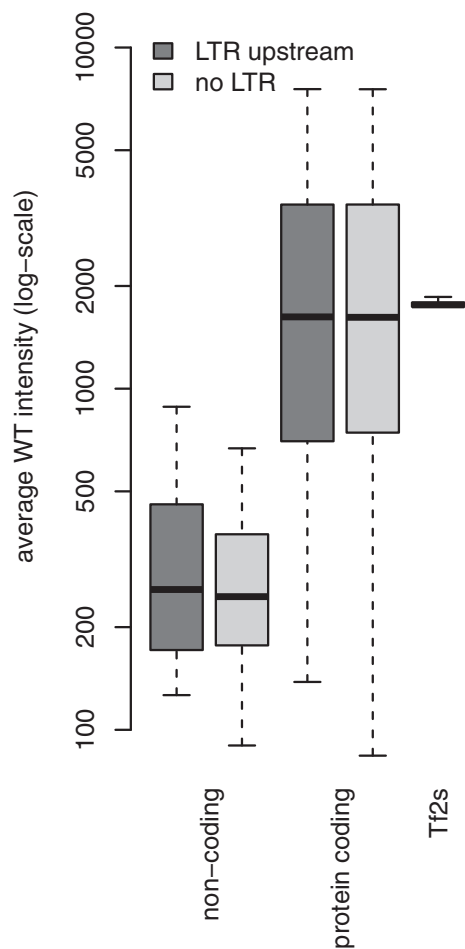

**Figure EV3. Genes with an upstream LTR are not repressed in WT cells.**

Transcripts with an upstream LTR are neither more nor less abundant than transcripts without an upstream LTR. Average signal intensity across genes of wild-type RNA hybridized to tiling array shown as box plot for each of the following categories: noncoding with LTR ( $n = 69$ )/without LTR ( $n = 1,665$ ); protein coding with LTR ( $n = 246$ )/without LTR ( $n = 4,887$ ); Tf2s ( $n = 13$ ).

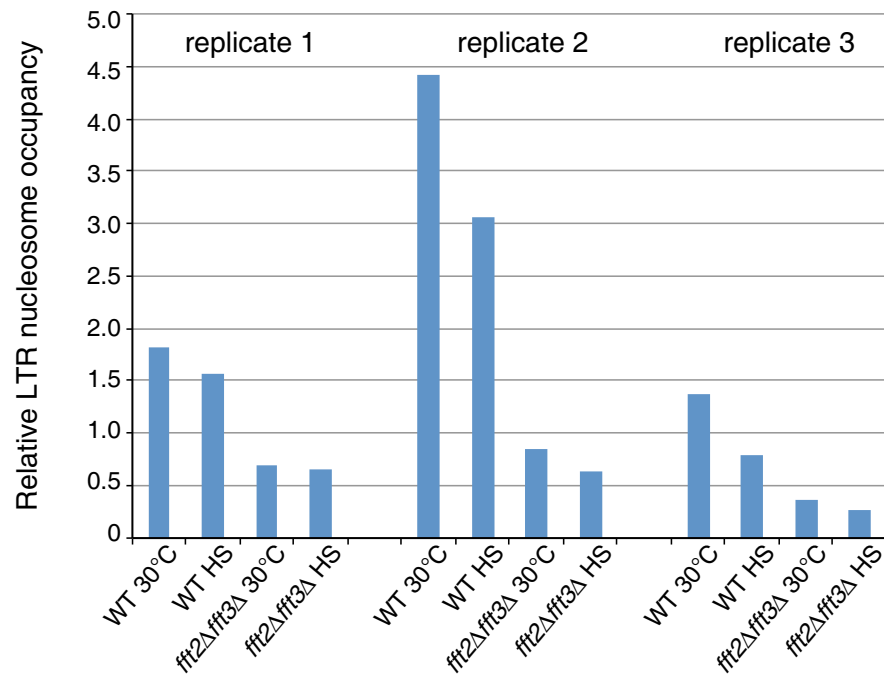

**Figure EV4. LTR nucleosome occupancy is reduced upon heat shock.**

This reduction is more pronounced in WT cells than in *fft2Δ fft3Δ* cells. LTR nucleosome occupancy shown relative to occupancy of the *Tf2* ORF + 1 nucleosome, measured by qPCR.

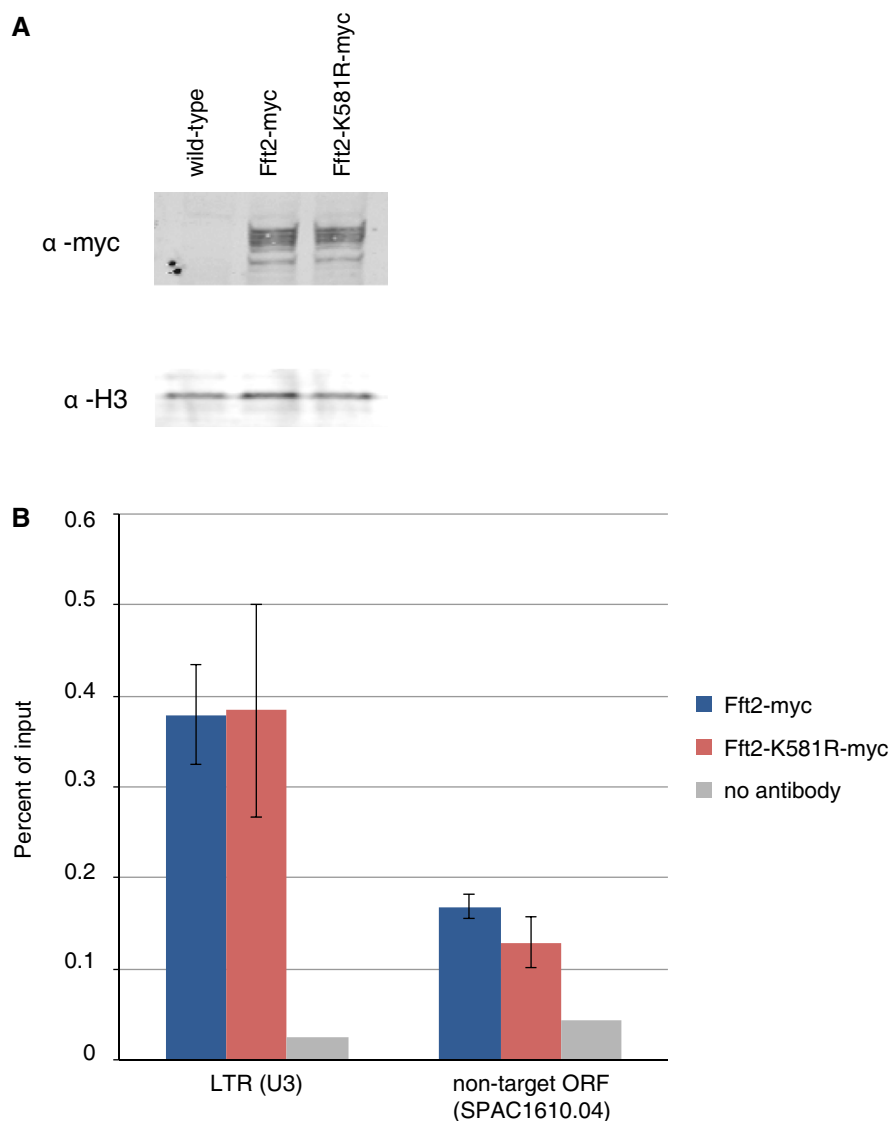

**Figure EV5. Fft2-K581R-myc is expressed and binds to chromatin at WT levels.**

**A** Whole-cell lysates, including an epitope-free WT control, were immunoblotted with  $\alpha$ -myc, to determine Fft2 expression level, and with  $\alpha$ -H3, to confirm equal loading.

**B** Chromatin immunoprecipitation indicates that Fft2-K581R-myc is recruited to LTR elements to the same degree as functional Fft2-myc. Results are shown as percent input, and a no-antibody control indicates the level of nonspecific protein A binding. Error bars reflect technical duplicates of biological duplicates.
